# Supplementary material for: Oriented lateral growth of monolayer MoS2 mediated by highly-oriented MoO2 nanorods on sapphire
Source: Royal Society of Chemistry journal article supplement (doi:10.1039/d4ce00836g), 2024-01-01
Supplement: d4ce00836g1.pdf [file d4ce00836g1.pdf]

## **Supplementary Information**

### **Oriented lateral growth of monolayer MoS<sub>2</sub> mediated by highly-oriented MoO<sub>2</sub> nanorods on sapphire**

Jie Wang,<sup>a</sup> Feifei Lan,<sup>b</sup> Yujian Wang,<sup>b</sup> Zeyan Wang,<sup>\*a</sup> Yingmin Wang,<sup>\*b</sup> and Baibiao Huang<sup>a</sup>

<sup>a</sup> State Key Laboratory of Crystal Materials, Shandong University, Jinan 250100, China

E-mail: [wangzeyan@sdu.edu.cn](mailto:wangzeyan@sdu.edu.cn)

<sup>b</sup> China Electronics Technology Group Corp 46th Research Institute, Tianjin 300220, China

E-mail: [wymzll@126.com](mailto:wymzll@126.com)

**Table S1.** A comparison of Raman characteristic peaks FWHMs of monolayer HO-MS in this work with previous reports.

| TMDs             | Growth substrate     | $E_{2g}^1$ FWHM( $\text{cm}^{-1}$ ) | $A_{1g}$ FWHM ( $\text{cm}^{-1}$ ) | Reference    |
|------------------|----------------------|-------------------------------------|------------------------------------|--------------|
| MoS <sub>2</sub> | sapphire             | 4.2                                 | 4.9                                | This work    |
| MoS <sub>2</sub> | sapphire             | $4.2 \pm 0.2$                       | $5.0 \pm 0.2$                      | <sup>1</sup> |
| MoS <sub>2</sub> | sapphire             | $4.0 \pm 0.3$                       | 4.2                                | <sup>2</sup> |
| MoS <sub>2</sub> | SiO <sub>2</sub> /Si | 4.1                                 | 4.5                                | <sup>3</sup> |
| MoS <sub>2</sub> | sapphire             | $4.4 \pm 0.3$                       | $4.8 \pm 0.2$                      | <sup>4</sup> |
| MoS <sub>2</sub> | sapphire             | $4.6 \pm 0.2$                       | $5.1 \pm 0.3$                      | <sup>5</sup> |

By estimating the reported graphs, the previously reported FWHMs with an error range was obtained.

**Table S2.** A comparison of PL FWHMs of monolayer HO-MS in this work with previous reports.

| TMDs             | Growth substrate     | Temperature(K) | PL FWHM (meV) | Reference    |
|------------------|----------------------|----------------|---------------|--------------|
| MoS <sub>2</sub> | sapphire             | Rt.            | 56            | This work    |
| MoS <sub>2</sub> | sapphire             | Rt.            | 58            | <sup>2</sup> |
| MoS <sub>2</sub> | SiO <sub>2</sub> /Si | Rt.            | 55            | <sup>3</sup> |
| MoS <sub>2</sub> | sapphire             | Rt.            | 56            | <sup>4</sup> |
| MoS <sub>2</sub> | SiO <sub>2</sub> /Si | 80             | 55            | <sup>6</sup> |
| MoS <sub>2</sub> | sapphire             | Rt.            | 57            | <sup>7</sup> |

By estimating the reported graphs, the previously reported FWHMs with an error range was obtained. Rt. represents room temperature.

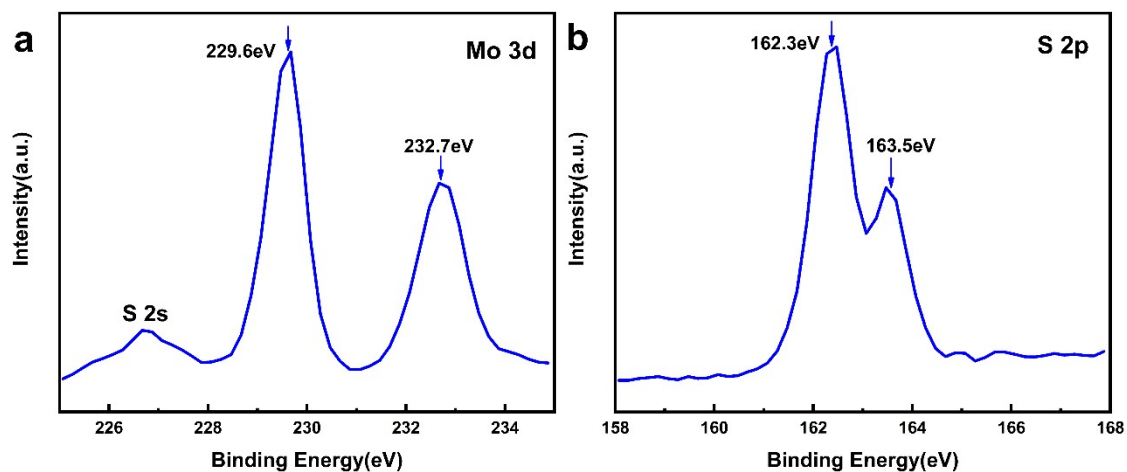

**Figure S1.** XPS results of HO-MS. (a) High-resolution spectrum of the Mo 3d peaks. (b) High-resolution spectrum of the S 2p peaks.

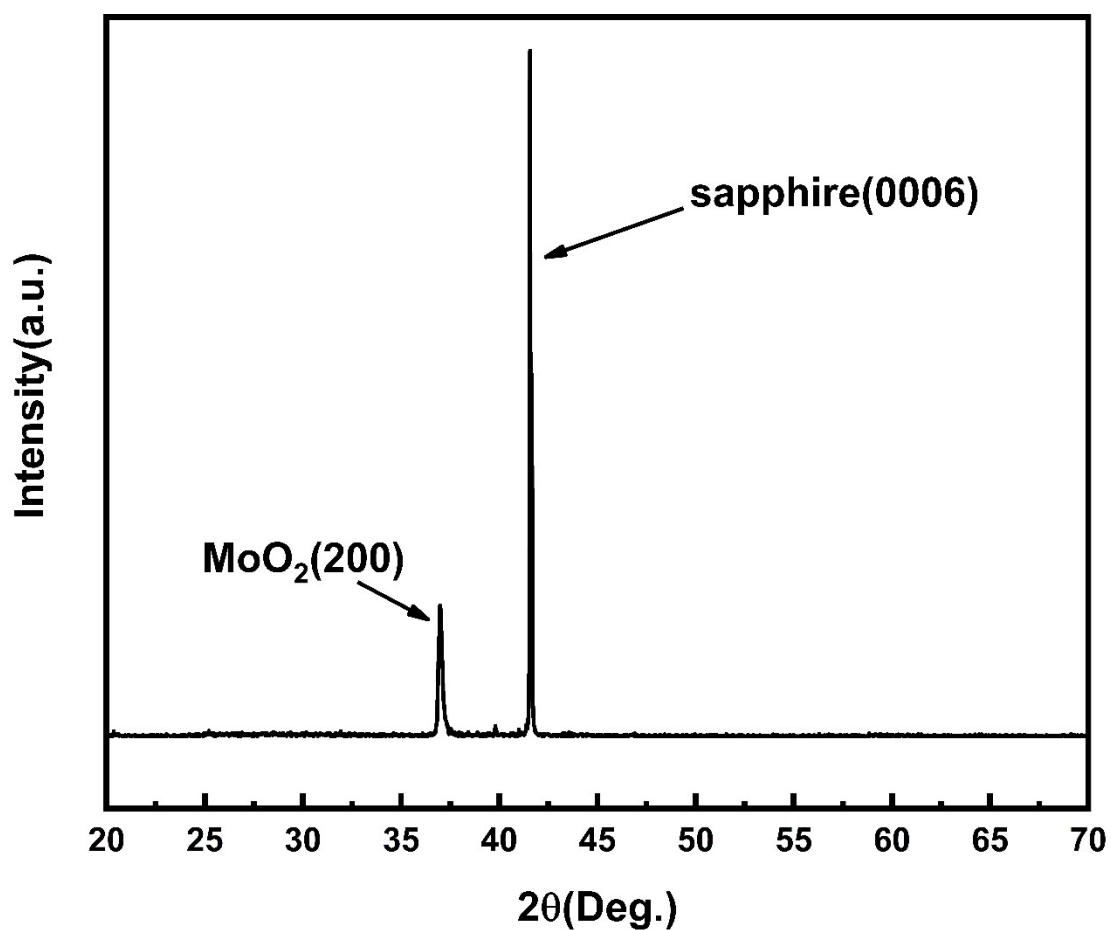

**Figure S2.** XRD pattern of HO-MS.

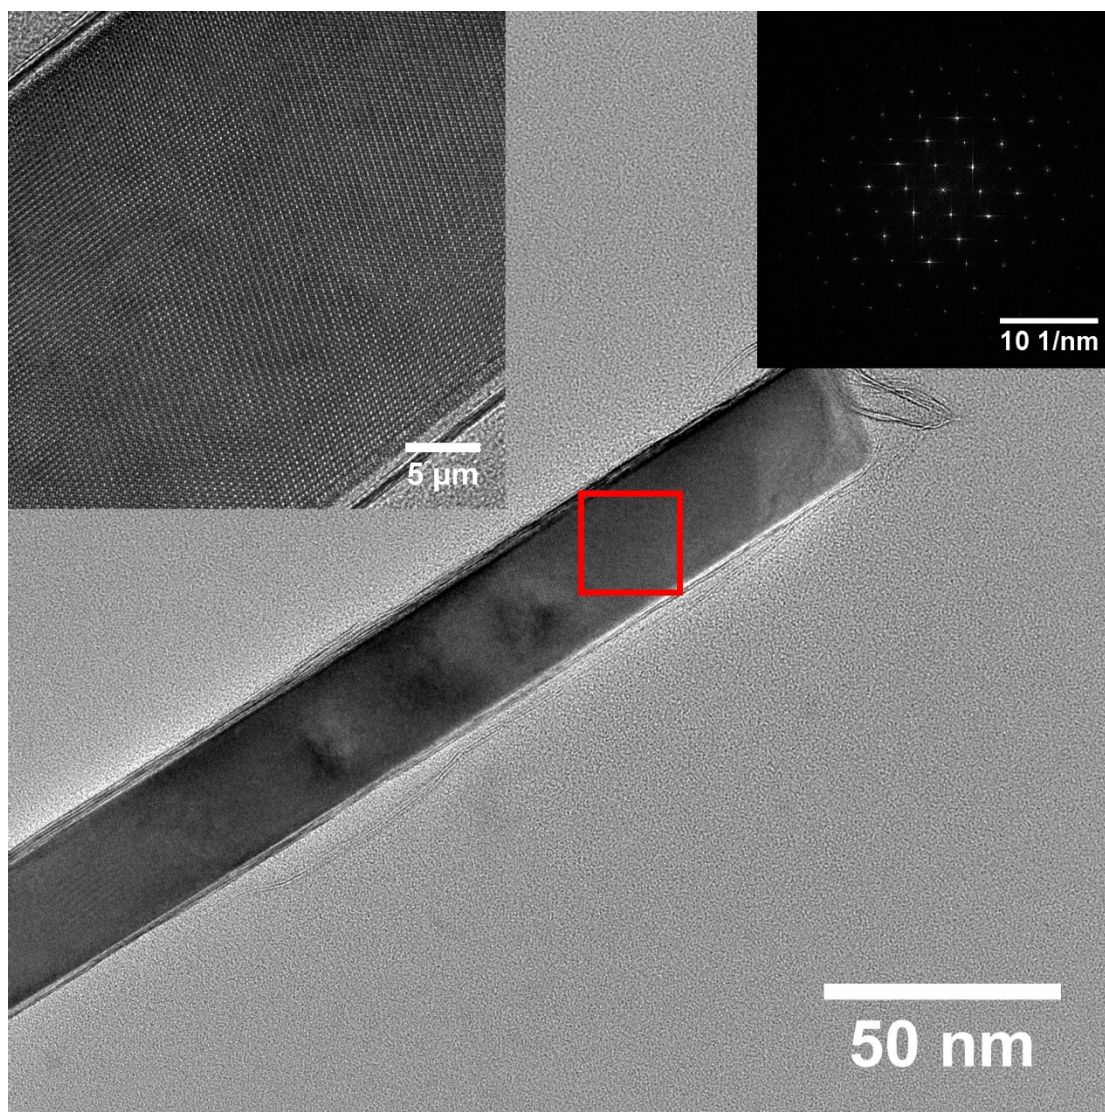

**Figure S3.** TEM image of MoO<sub>2</sub> nanorod. The two insets correspond to an enlarged TEM image and FFT pattern of the boxed area.

## References

1. J. Zhu, H. Xu, G. Zou, W. Zhang, R. Chai, J. Choi, J. Wu, H. Liu, G. Shen and H. Fan, *Journal of the American Chemical Society*, 2019, **141**, 5392-5401.
2. A. Singh, M. Moun, M. Sharma, A. Barman, A. Kumar Kapoor and R. Singh, *Applied Surface Science*, 2021, **538**, 148201.
3. P. Yang, Y. Shan, J. Chen, G. Ekoya, J. Han, Z.-J. Qiu, J. Sun, F. Chen, H. Wang, W. Bao, L. Hu, R.-J. Zhang, R. Liu and C. Cong, *Nanoscale*, 2020, **12**, 1958-1966.
4. T. Li, W. Guo, L. Ma, W. Li, Z. Yu, Z. Han, S. Gao, L. Liu, D. Fan, Z. Wang, Y. Yang, W. Lin, Z. Luo, X. Chen, N. Dai, X. Tu, D. Pan, Y. Yao, P. Wang, Y. Nie, J. Wang, Y. Shi and X. Wang, *Nature Nanotechnology*, 2021, **16**, 1201-1207.
5. L. Li, Q. Wang, F. Wu, Q. Xu, J. Tian, Z. Huang, Q. Wang, X. Zhao, Q. Zhang, Q. Fan, X. Li, Y. Peng, Y. Zhang, K. Ji, A. Zhi, H. Sun, M. Zhu, J. Zhu, N. Lu, Y. Lu, S. Wang, X. Bai, Y. Xu, W. Yang, N. Li, D. Shi, L. Xian, K. Liu, L. Du and G. Zhang, *Nature Communications*, 2024, **15**, 1825.
6. Q. Wu, H. Nong, R. Zheng, R. Zhang, J. Wang, L. Yang and B. Liu, *Angewandte Chemie International Edition*, 2023, **62**, e202301501.
7. P. K. Mohapatra, K. Ranganathan and A. Ismach, *Advanced Materials Interfaces*, 2020, **7**, 2001549.
